# Supplementary material for: Molecular basis of Tousled-Like Kinase 2 activation
Source: PubMed Central journal article supplement (PMC6023931; doi:10.1038/s41467-018-04941-y), 2018-06-28
Supplement: 41467_2018_4941_MOESM3_ESM.pdf [file 41467_2018_4941_MOESM3_ESM.pdf]

## Description of Additional Supplementary Files

**File Name:** Supplementary Data 1

**Description:**

1.- for the HEK293 expressed TLK2 constructs phosphosite table: Phosphorylation sites identified by LC-MS/MS in TLK2 expressed in HEK293 cells.

Sheet 1 "Phospho(STY)Sites" contains the raw-output of the MaxQuant search output.

Sheet 2 "P(STY) Sites TLK2" is a subset of sheet 1 with only sites in TLK2.

Sheet 3 "TLK2 Norm P-Int" shows the log-transformed and normalized (row-wise median subtraction) intensities of all phosphorylation sites.

Sheet 4 "TLK2 Median Occupancy" contains occupancy values for all phosphorylation sites represented with median and standard deviation per construct.

2.- for the E.coli expressed  $\Delta$ N-TLK2 phosphosite table: Phosphorylation sites identified by LC-MS/MS in TLK2 expressed in E. coli.

Sheet 1 "Phospho(STY)Sites" contains the raw-output of the MaxQuant search output.

Sheet 2 "P(STY) Sites TLK2" is a subset of sheet 1 with only sites in TLK2.

Sheet 3 "TLK2 Filtered-41Sites NormInt" contains the log-transformed and normalized (row-wise median subtraction) intensities of all phosphorylation sites with missing values imputed as specified in the supplementary methods.

Sheet 4 "NormInt Distribution" confirms the normal distribution of the intensity values.

Sheet 5 "KDom Filter-11Sites NormInt M41" shows only phosphorylation sites in the kinase-domain.
